# Supplementary material
Source: MDPI journal article supplement (https://www.mdpi.com/2673-9623/3/4/31)
Supplement: s1 [file s1]

## SUPPLEMENTARY MATERIAL

### **Table Captions**

**Table S1.** Input and output data for process of biodiesel production.

**Table S2.** Input and output data for alcohol recycle unit.

**Table S3.** Input and output data for etherification reaction using ethanol and isopropanol at 110°C and molar ratio of 1:6 (glycerol/alcohol).

**Table S4.** Input and output data from DWSIM for etherification reaction using ethanol and isopropanol at 110°C and molar ratio of 1:12 (glycerol/alcohol).

**Table S5.** Input and output data for ether purification process (etherification using glycerol/ethanol molar ratio of 1:3 at 110°C).

**Table S6.** Input and output data for ether purification process (etherification using glycerol/isopropanol molar ratio of 1:3 at 110°C).

**Table S1**

| <b>Conditions</b>                        | <b>Input</b> | <b>Output</b> |                |
|------------------------------------------|--------------|---------------|----------------|
|                                          | STR-01       | Biodiesel     | Crude glycerol |
| <b>Temperature (°C)</b>                  | 28.7         | 60.0          | 60.0           |
| <b>Pressure (bar)</b>                    | 1.01         | 1.01          | 1.01           |
| <b>Mass Flow (kg/h)</b>                  | 1227.12      | 1004.31       | 222.81         |
| <b>Volumetric Flow (m<sup>3</sup>/h)</b> | 1.347        | 1.178         | 0.260          |
| <b>Specific Enthalpy (kJ/kg)</b>         | -203.64      | -232.52       | -936.48        |
| <b>Component mole fraction</b>           |              |               |                |
| <b>Triolein</b>                          | 0.138        | 0.000         | 0.017          |
| <b>Methanol</b>                          | 0.830        | 0.436         | 0.728          |
| <b>Sodium Hydroxide</b>                  | 0.030        | 0.030         | 0.051          |
| <b>Biodiesel</b>                         | 0.000        | 0.394         | 0.000          |
| <b>Crude glycerol</b>                    | 0.000        | 0.131         | 0.219          |

STR-01: Mixture of vegetable oil, methanol and sodium hydroxide.

**Table S2**

| <b>Alcohol recovery / Ethanol</b>        |              |               |          |
|------------------------------------------|--------------|---------------|----------|
| <b>Conditions</b>                        | <b>Input</b> | <b>Output</b> |          |
|                                          | Polar comp.  | STR-67        | Alcohol  |
| <b>Temperature (°C)</b>                  | 79.9         | -10.0         | -10.0    |
| <b>Pressure (bar)</b>                    | 1.01         | 1.01          | 1.01     |
| <b>Mass Flow (kg/h)</b>                  | 117.89       | 51.00         | 66.89    |
| <b>Volumetric Flow (m<sup>3</sup>/h)</b> | 0.137        | 0.050         | 0.082    |
| <b>Spec. Enthalpy (kJ/kg)</b>            | -1162.72     | -1931.98      | -1012.28 |
| <b>Component mole fraction</b>           |              |               |          |
| <b>Ethanol</b>                           | 0.434        | 0.000         | 1.000    |
| <b>Glycerol</b>                          | 0.068        | 0.121         | 0.000    |
| <b>Water</b>                             | 0.496        | 0.878         | 0.000    |
| <b>Alcohol recovery / Isopropanol</b>    |              |               |          |
| <b>Conditions</b>                        | <b>Input</b> | <b>Output</b> |          |
|                                          | Polar comp.  | STR-67        | Alcohol  |
| <b>Temperature (°C)</b>                  | 85.8         | -10.0         | -10.0    |
| <b>Pressure (bar)</b>                    | 1.01         | 1.01          | 1.01     |
| <b>Mass Flow (kg/h)</b>                  | 203.86       | 52.78         | 151.07   |
| <b>Volumetric Flow (m<sup>3</sup>/h)</b> | 26.267       | 0.043         | 0.186    |
| <b>Spec. Enthalpy (kJ/kg)</b>            | -527.98      | -1523.60      | -844.97  |
| <b>Component mole fraction</b>           |              |               |          |
| <b>Isopropanol</b>                       | 0.704        | 0.000         | 1.000    |
| <b>Glycerol</b>                          | 0.127        | 0.433         | 0.000    |
| <b>Water</b>                             | 0.167        | 0.566         | 0.000    |

STR-67: Mixture of water and glycerol.

Table S3

| Etherification with ethanol (1:6 molar ratio)     |          |             |         |         |
|---------------------------------------------------|----------|-------------|---------|---------|
| Conditions                                        | Input    |             | Output  |         |
|                                                   | Glycerol | Ethanol     | STR-12  | STR-13  |
| Temperature (°C)                                  | 229.2    | 25.0        | 110.0   | 110.0   |
| Pressure (bar)                                    | 1.01     | 1.01        | 1.01    | 1.01    |
| Mass Flow (kg/h)                                  | 95.51    | 286.66      | 219.59  | 162.57  |
| Volumetric Flow (m <sup>3</sup> /h)               | 0.087    | 0.364       | 166.250 | 0.188   |
| Spec. Enthalpy (kJ/kg)                            | -475.76  | -922.64     | 134.65  | -587.50 |
| Component mole fraction                           |          |             |         |         |
| Ethanol                                           | 0.000    | 1.000       | 0.829   | 0.259   |
| Glycerol                                          | 1.000    | 0.000       | 0.000   | 0.112   |
| 3-ethoxypropan-1,2-diol                           | 0.000    | 0.000       | 0.000   | 0.154   |
| 1,3-diethoxypropan-2-ol                           | 0.000    | 0.000       | 0.002   | 0.255   |
| 1,2,3-triethoxypropane                            | 0.000    | 0.000       | 0.000   | 0.000   |
| Water                                             | 0.000    | 0.000       | 0.169   | 0.220   |
| Etherification with isopropanol (1:6 molar ratio) |          |             |         |         |
| Conditions                                        | Input    |             | Output  |         |
|                                                   | Glycerol | Isopropanol | STR-12  | STR-13  |
| Temperature (°C)                                  | 229.2    | 25.0        | 110.0   | 110.0   |
| Pressure (bar)                                    | 1.01     | 1.01        | 1.01    | 1.01    |
| Mass Flow (kg/h)                                  | 95.51    | 373.94      | 313.26  | 156.19  |
| Volumetric Flow (m <sup>3</sup> /h)               | 0.087    | 0.478       | 176.982 | 0.174   |
| Spec. Enthalpy (kJ/kg)                            | -475.76  | -754.44     | 140.72  | -615.86 |
| Component mole fraction                           |          |             |         |         |
| Isopropanol                                       | 0.000    | 1.000       | 0.894   | 0.309   |
| Glycerol                                          | 1.000    | 0.000       | 0.000   | 0.224   |
| 3-isopropoxypropan-1,2-diol                       | 0.000    | 0.000       | 0.000   | 0.402   |
| 1,3-di-isopropoxypropan-2-ol                      | 0.000    | 0.000       | 0.000   | 0.010   |
| Water                                             | 0.000    | 0.000       | 0.106   | 0.055   |

STR-12: Reaction mixture (Vapor phase); STR-13: Reaction mixture (Liquid phase).

Table S4

| Etherification with ethanol (1:12 molar ratio)     |          |             |         |         |
|----------------------------------------------------|----------|-------------|---------|---------|
| Conditions                                         | Input    |             | Output  |         |
|                                                    | Glycerol | Ethanol     | STR-12  | STR-13  |
| Temperature (°C)                                   | 229.2    | 25.0        | 110.0   | 110.0   |
| Pressure (bar)                                     | 1.01     | 1.01        | 1.01    | 1.01    |
| Mass Flow (kg/h)                                   | 95.51    | 573.32      | 495.01  | 173.82  |
| Volumetric Flow (m <sup>3</sup> /h)                | 0.087    | 0.729       | 365.001 | 0.196   |
| Spec. Enthalpy (kJ/kg)                             | -475.76  | -922.64     | 134.14  | -465.04 |
| Component mole fraction                            |          |             |         |         |
| Ethanol                                            | 0.000    | 1.000       | 0.860   | 0.281   |
| Glycerol                                           | 1.000    | 0.000       | 0.000   | 0.092   |
| 3-ethoxypropan-1,2-diol                            | 0.000    | 0.000       | 0.000   | 0.089   |
| 1,3-diethoxypropan-2-ol                            | 0.000    | 0.000       | 0.001   | 0.167   |
| 1,2,3-triethoxypropane                             | 0.000    | 0.000       | 0.002   | 0.185   |
| Water                                              | 0.000    | 0.000       | 0.136   | 0.186   |
| Etherification with isopropanol (1:12 molar ratio) |          |             |         |         |
| Conditions                                         | Input    |             | Output  |         |
|                                                    | Glycerol | Isopropanol | STR-12  | STR-13  |
| Temperature (°C)                                   | 229.2    | 25.0        | 110.0   | 110.0   |
| Pressure (bar)                                     | 1.01     | 1.01        | 1.01    | 1.01    |
| Mass Flow (kg/h)                                   | 95.51    | 745.35      | 676.14  | 164.72  |
| Volumetric Flow (m <sup>3</sup> /h)                | 0.087    | 0.953       | 371.136 | 0.188   |
| Spec. Enthalpy (kJ/kg)                             | -475.76  | -754.44     | 140.46  | -588.77 |
| Component mole fraction                            |          |             |         |         |
| Isopropanol                                        | 0.000    | 1.000       | 0.933   | 0.335   |
| Glycerol                                           | 1.000    | 0.000       | 0.000   | 0.128   |
| 3-isopropoxypropan-1,2-diol                        | 0.000    | 0.000       | 0.000   | 0.494   |
| 1,3-di-isopropoxypropan-2-ol                       | 0.000    | 0.000       | 0.000   | 0.011   |
| Water                                              | 0.000    | 0.000       | 0.067   | 0.032   |

STR-12: Reaction mixture (Vapor phase); STR-13: Reaction mixture (Liquid phase).

**Table S5**

| <b>Ether purification for simulation using ethanol (1:3 molar ratio)</b> |               |               |                |               |                |                    |
|--------------------------------------------------------------------------|---------------|---------------|----------------|---------------|----------------|--------------------|
| <b>Conditions</b>                                                        | <b>Input</b>  |               |                | <b>Output</b> |                |                    |
|                                                                          | <b>STR-12</b> | <b>STR-13</b> | <b>Solvent</b> | <b>Ethers</b> | <b>Solvent</b> | <b>Polar Comp.</b> |
| <b>Temperature (°C)</b>                                                  | 110.0         | 110.0         | 25.0           | 213.9         | 69.8           | 79.8               |
| <b>Pressure (bar)</b>                                                    | 1.01          | 1.01          | 1.01           | 1.01          | 1.01           | 1.01               |
| <b>Mass Flow (kg/h)</b>                                                  | 59.62         | 179.21        | 238.83         | 116.12        | 243.66         | 117.88             |
| <b>Molar Flow (kmol/h)</b>                                               | 1.65          | 2.50          | 2.77           | 0.78          | 2.80           | 3.34               |
| <b>Vol. Flow (m<sup>3</sup>/h)</b>                                       | 51.91         | 0.20          | 0.36           | 0.14          | 53.65          | 0.14               |
| <b>Spec. Enthalpy (kJ/kmol)</b>                                          | 137.42        | -614.17       | -366.01        | -92.81        | -30.33         | -<br>1173.78       |
| <b>Component mole fraction</b>                                           |               |               |                |               |                |                    |
| <b>Ethanol</b>                                                           | 0.636         | 0.160         | 0.000          | 0.000         | 0.000          | 0.434              |
| <b>Glycerol</b>                                                          | 0.000         | 0.092         | 0.000          | 0.000         | 0.000          | 0.068              |
| <b>3-ethoxypropan-1,2-diol</b>                                           | 0.000         | 0.095         | 0.000          | 0.304         | 0.000          | 0.000              |
| <b>1,3-dietoxipropan-2-ol</b>                                            | 0.001         | 0.115         | 0.000          | 0.361         | 0.001          | 0.000              |
| <b>1,2,3-triethoxypropane</b>                                            | 0.001         | 0.112         | 0.000          | 0.324         | 0.010          | 0.000              |
| <b>Water</b>                                                             | 0.361         | 0.425         | 0.000          | 0.000         | 0.000          | 0.496              |
| <b>N-hexane</b>                                                          | 0.000         | 0.000         | 1.000          | 0.010         | 0.988          | 0.000              |

STR-12: Reaction mixture (Vapor phase); STR-13: Reaction mixture (Liquid phase).

**Table S6**

| <b>Ether purification for simulation using isopropanol (1:3 molar ratio)</b> |               |               |               |               |               |                    |
|------------------------------------------------------------------------------|---------------|---------------|---------------|---------------|---------------|--------------------|
| <b>Conditions</b>                                                            | <b>Input</b>  |               |               | <b>Output</b> |               |                    |
|                                                                              | <b>STR-12</b> | <b>STR-13</b> | <b>Hexane</b> | <b>Ethers</b> | <b>Hexane</b> | <b>Polar Comp.</b> |
| <b>Temperature (°C)</b>                                                      | 110.00        | 110.00        | 25.00         | 224.30        | 69.09         | 81.93              |
| <b>Pressure (bar)</b>                                                        | 1.01          | 1.01          | 1.01          | 1.01          | 1.01          | 1.01               |
| <b>Mass Flow (kg/h)</b>                                                      | 675.91        | 164.72        | 840.63        | 97.85         | 854.59        | 728.83             |
| <b>Molar Flow (kmol/h)</b>                                                   | 11.80         | 1.63          | 9.75          | 0.73          | 9.85          | 12.61              |
| <b>Vol. Flow (m3/h)</b>                                                      | 371.02        | 0.19          | 1.28          | 0.12          | 1.38          | 0.98               |
| <b>Spec. Enthalpy (kJ/kmol)</b>                                              | 140.44        | -587.04       | -<br>366.01   | -277.79       | -261.67       | -615.80            |
| <b>Component mole fraction</b>                                               |               |               |               |               |               |                    |
| <b>Isopropanol</b>                                                           | 0.932         | 0.335         | 0.000         | 0.000         | 0.000         | 0.916              |
| <b>Glycerol</b>                                                              | 0.000         | 0.127         | 0.000         | 0.000         | 0.000         | 0.016              |
| <b>3-ethoxypropan-1,2-diol</b>                                               | 0.000         | 0.494         | 0.000         | 0.975         | 0.010         | 0.000              |
| <b>1,3-dietoxipropan-2-ol</b>                                                | 0.000         | 0.011         | 0.000         | 0.014         | 0.001         | 0.000              |
| <b>Water</b>                                                                 | 0.067         | 0.031         | 0.000         | 0.000         | 0.000         | 0.067              |
| <b>N-hexane</b>                                                              | 0.000         | 0.000         | 1.000         | 0.010         | 0.989         | 0.000              |

STR-12: Reaction mixture (Vapor phase); STR-13: Reaction mixture (Liquid phase).
